# Supplementary material for: Bioactive potential of Macrocybe titans extracts: antioxidant activity, antimicrobial effects, and phenolic composition
Source: Research Square preprint supplement (doi:10.21203/rs.3.rs-7693100/v1), 2025-10-16
Supplement: Supplementary file 1 [file c59b2727f663a90c64831c64.docx]

**Bioactive potential of *Macrocybe titans* extracts: antioxidant activity, antimicrobial effects, and phenolic composition**

**Gabrielle Caroline Peiter1*,** **Keiti Lopes Maestre2, Thiago Cintra Maniglia3, Ricardo Fiori Zara4, Gabrieli Maria Huff5, Adriana Fiorini Rosado1, Fábio Rogério Rosado1, Joana Angélica Loureiro6,7,8**

1 Department of Biochemistry and Molecular Biology, Federal University of Paraná, Palotina Sector, 2153 - Pioneiro Street, 85950-000 Palotina, PR, Brazil;

2 Department of Chemical Engineering, State University of West Paraná, 645 - Faculdade Street, 85903-000 Toledo, PR, Brazil;

3 Department of Bioprocess Engineering and Biotechnology, Federal Technological University of Paraná, Cristo Rei Street, 85902-490 Toledo, PR, Brazil;

4 Academic Department of Chemistry, Federal University of Technology - Paraná, Campus Toledo (UTFPR-TD) Rua Cristo Rei, 19, 85902-490 Toledo, Brazil;

5 Gene Expression Regulation Laboratory, Carlos Chagas Institute, FIOCRUZ - Paraná, 81350-010 Curitiba, Brazil;

6 LEPABE, Department of Chemical Engineering, Faculty of Engineering of the University of Porto, Rua Dr. Roberto Frias, 4200-465 Porto, Portugal;

7 ALiCE – Associate Laboratory in Chemical Engineering, Faculty of Engineering, University of Porto, Rua Dr. Roberto Frias, 4200-465 Porto, Portugal;

8 Department of Mechanical Engineering, Faculty of Engineering, University of Porto, Rua Dr. Roberto Frias, 4200-465 Porto, Portugal.

Sequences from the internal transcribed spacer (ITS1-5.8S-ITS2) region of ribosomal DNA from isolates MT1, MT2, MT5, MT10, and MT31

>MT1

ACTTGGTCAAGTTGTTGCTGGTTCTTTTAGAGCATGTGCACACTTGGCTCTCGTTTCTAAACCACTTGTGCACCTTTTGTAGACTTGGGAGTTTGATTCAAGAGTGATCTTGGACCTTACGCTCTTGTCTATGTCTTTTCATGTCATTTACTCTGTGTATAAGAATGTTTTCTAAGGTATTTTTGATGCCTTTAAATCATATACAACTTTCAACAACGGATCTCTTGGCTCTCGCATCGATGAAGAACGCAGCGAAATGCGATAAGTAATGTGAATTGCAGAATTCAGTGAATCATCGAATCTTTGAACGCACCTTGCGCTCCTTGGTATTCCGAGGAGCATGCCTGTTTGAGTGTCATGAAATTCTCAACCTTTGTTACTTTTTTT

>MT2

ACTTGGTCAAGTTGTTGCTGGTTCTTTTAGAGCATGTGCACACTTGGCTCTCGTTTCTAAACCACTTGTGCACCTTTTGTAGACTTGGGAGTTTGATTCAAGAGTGATCTTGGACCTTACGCTCTTGTCTATGTCTTTTCATGTCATTTACTCTGTGTATAAGAATGTTTTCTAAGGTATTTTTGATGCCTTTAAATCATATACAACTTTCAACAACGGATCTCTTGGCTCTCGCATCGATGAAGAACGCAGCGAAATGCGATAAGTAATGTGAATTGCAGAATTCAGTGAATCATCGAATCTTTGAACGCACCTTGCGCTCCTTGGTATTCCGAGGAGCATGCCTGTTTGAGTGTCATGAAATTCTCAACCTTTGTTACTTTTTTT

>MT5

ACTTGGTCAAGTTGTTGCTGGTTCTTTTAGAGCATGTGCACACTTGGCTCTCGTTTCTAAACCACTTGTGCACCTTTTGTAGACTTGGGAGTTTGATTCAAGAGTGATCTTGGACCTTACGCTCTTGTCTATGTCTTTTCATGTCATTTACTCTGTGTATAAGAATGTTTTCTAAGGTATTTTTGATGCCTTTAAATCATATACAACTTTCAACAACGGATCTCTTGGCTCTCGCATCGATGAAGAACGCAGCGAAATGCGATAAGTAATGTGAATTGCAGAATTCAGTGAATCATCGAATCTTTGAACGCACCTTGCGCTCCTTGGTATTCCGAGGAGCATGCCTGTTTGAGTGTCATGAAATTCTCAACCTTTGTTACTTTTTTT

>MT10

ACTTGGTCAAGTTGTTGCTGGTTCTTTTAGAGCATGTGCACACTTGGCTCTCGTTTCTAAACCACTTGTGCACCTTTTGTAGACTTGGGAGTTTGATTCAAGAGTGATCTTGGACCTTACGCTCTTGTCTATGTCTTTTCATGTCATTTACTCTGTGTATAAGAATGTTTTCTAAGGTATTTTTGATGCCTTTAAATCATATACAACTTTCAACAACGGATCTCTTGGCTCTCGCATCGATGAAGAACGCAGCGAAATGCGATAAGTAATGTGAATTGCAGAATTCAGTGAATCATCGAATCTTTGAACGCACCTTGCGCTCCTTGGTATTCCGAGGAGCATGCCTGTTTGAGTGTCATGAAATTCTCAACCTTTGTTACTTTTTTT

>MT31

ACTTGGTCAAGTTGTTGCTGGTTCTTTTAGAGCATGTGCACACTTGGCTCTCGTTTCTAAACCACTTGTGCACCTTTTGTAGACTTGGGAGTTTGATTCAAGAGTGATCTTGGACCTTACGCTCTTGTCTATGTCTTTTCATGTCATTTACTCTGTGTATAAGAATGTTTTCTAAGGTATTTTTGATGCCTTTAAATCATATACAACTTTCAACAACGGATCTCTTGGCTCTCGCATCGATGAAGAACGCAGCGAAATGCGATAAGTAATGTGAATTGCAGAATTCAGTGAATCATCGAATCTTTGAACGCACCTTGCGCTCCTTGGTATTCCGAGGAGCATGCCTGTTTGAGTGTCATGAAATTCTCAACCTTTGTTACTTTTTTT
